# Supplementary material for: Novel reverse transcription-multiple inner primer loop-mediated isothermal amplification (RT-MIPLAMP) for visual and sensitive detection of SARS-CoV-2
Source: Royal Society of Chemistry journal article supplement (doi:10.1039/d2ay01330d), 2022-01-01
Supplement: d2ay01330d1.pdf [file d2ay01330d1.pdf]

## **Electronic Supporting Information**

### **A novel reverse transcription-multiple inner primer loop-mediated isothermal amplification (RT-MIPLAMP) for visual and sensitive detection of SARS-CoV-2**

Xiaofei He, Fengxia Su,\* Yutong Chen, Zhengping Li\*

Beijing Key Laboratory for Bioengineering and Sensing Technology, School of Chemistry and Biological Engineering, University of Science and Technology Beijing, Beijing, 100083, China.

E-mail: sufengxia@ustb.edu.cn; lzpbd@ustb.edu.cn

#### **List of contents**

- 1. Table S1 The sequences of the primers used in this work.**
- 2. The optimization of the SYBR Green I concentration in the visual RT-MIPLAMP assay**
- 3. The sensitivity of RT-MIPLAMP for assaying ORF1ab gene**
- 4. The effect of loop primers on RT-MIPLAMP for assaying N gene**

## 1. Table S1 The sequences of the primers used in this work.

| Name                                                |       | Sequences (5'-3')                                      |
|-----------------------------------------------------|-------|--------------------------------------------------------|
| N gene                                              | FIP-1 | TCTGTCAAGCAGCAGCAAAGCACTCCTGCTAGAATG<br>GCTGGCAAT      |
|                                                     | BIP-1 | GAACCAGCTTGAGAGCAAAATGTCTAGCAGCAGATT<br>TCTTAGTGACAG   |
|                                                     | F3-1  | CAACTCCAGGCAGCAGTA                                     |
|                                                     | B3-1  | TTTGCCGAGGCTTCTTAGA                                    |
|                                                     | FIP-2 | TACTGCTGCCTGGAGTTGACTCATCACGTAGTCGCAA<br>CA            |
|                                                     | BIP-2 | TCTAAGAAGCCTCGGCAAAAACACTGTGTTACATTGTAT<br>GCTTTAGTGG  |
|                                                     | F3-2  | CGGCAGTCAAGCCTCTT                                      |
|                                                     | B3-2  | TTCTGGACCACGTCTG                                       |
|                                                     | FIP-3 | AAGAGGCTTGACTGCCGCCAAAAGGCTTCTACGCAG                   |
|                                                     | BIP-3 | GCAGACGTGGTCCAGAACAATAGTTCCTGGTCCC<br>CAA              |
|                                                     | F3-3  | CAACTTCCTCAAGGAACAACA                                  |
|                                                     | B3-3  | CCAATGTTTGTAATCAGTTCCTT                                |
|                                                     | LF    | AGAGCAGCATCACCGCC                                      |
|                                                     | LB    | AGGCCAACAACAACAAGG                                     |
| ORF1ab gene                                         | FIP-1 | ACCATCAACAAATATTTTTCTCACTAGTTTATTCTCT<br>ACAGTGTTCCCAC |
|                                                     | BIP-1 | TTGTAGTTTCAACTGGATACCACTACATCCTGATTAT<br>GTACAACACC    |
|                                                     | FIP-2 | AAGTTTGCACAATGCAGAATGCAAATTGTGTTAACT<br>GTTTGG         |
|                                                     | BIP-2 | CTTACATAGCTCTAGACTTAGTTTTAAGGGGGTCAGC<br>AGCATAAC      |
|                                                     | F3-2  | TTTGACCGTTATTTTAAATATTGG                               |
|                                                     | B3-2  | TAGTAATAGATTACCAGAAGCA                                 |
| PCR primer for N gene of SARS-CoV-2                 | FP    | TAATACGACTCACTATAGGATGTCTGATAATGGACC<br>CCAAAATCA      |
|                                                     | RP    | TTAGGCCTGAGTTGAGTCAGC                                  |
| PCR primer for ORF1ab gene of SARS-CoV-2            | FP    | TAATACGACTCACTATAGGGTGTTAATGCCTATATTA<br>ACCTTGACCA    |
|                                                     | RP    | GCAACATTGTTAGTAAGTGCAGC                                |
| PCR primers for N gene of Bat SARS-like coronavirus | FP    | TAATACGACTCACTATAGGATGTCTGATAATGGACC<br>CCAAAACC       |
|                                                     | RP    | TTAAGCCTGGGTTGAATCAGTAC                                |

|                                                  |    |                                                    |
|--------------------------------------------------|----|----------------------------------------------------|
| isolate bat-SL-CoVZC45                           |    |                                                    |
| PCR primers for N gene of SARS coronavirus Tor2  | FP | TAATACGACTCACTATAGGATGTCTGATAATGGACC<br>CCAATCAAA  |
|                                                  | RP | TTATGCCTGAGTTGAATCAGCAGAAG                         |
| PCR primers for N gene of human coronavirus HKU1 | FP | TAATACGACTCACTATAGGATGTCTTATACTCCCGGT<br>CATTATGCT |
|                                                  | RP | TTAAGCAACAGAGTCTTCTACATAAGGATC                     |

## 2. The optimization of the SYBR Green I concentration in the visual RT-MIPLAMP assay

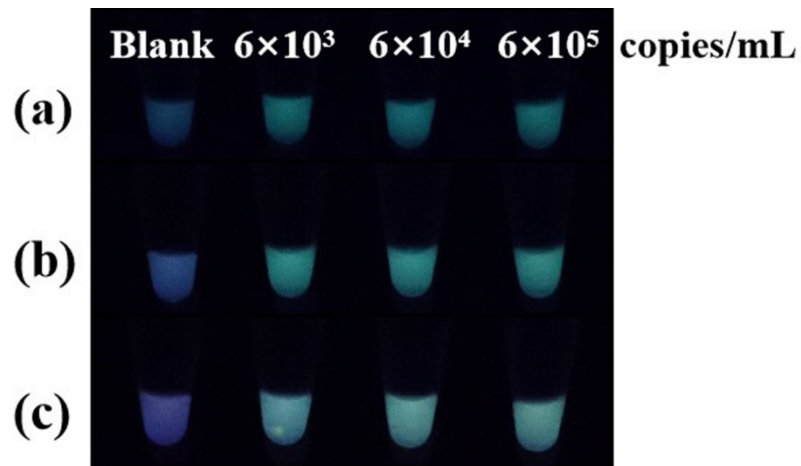

Figure S1 Visual RT-MIPLAMP detection of N gene with (a) 2 ng/ $\mu$ L, (b) 4 ng/ $\mu$ L and (c) 6 ng/ $\mu$ L SYBR Green I.

In order to make the RT-MIPLAMP universally applicable in all areas including field-testing, SYBR Green I is employed to identify the DNA double strand products to enable the visual detection of SARS-CoV-2. The concentration of the SYBR Green I is optimized in the visual RT-MIPLAMP assay. When 2 ng/ $\mu$ L SYBR Green I is used,  $6\times 10^3$ ,  $6\times 10^4$  and  $6\times 10^5$  copies/mL N gene change the color to green, while blank is still colorless, indicating 2 ng/ $\mu$ L SYBR Green I can discriminate the blank and samples. When 4 ng/ $\mu$ L SYBR Green I is used, the color difference between samples and blank is more obvious. When the SYBR Green I concentration increases to 6 ng/ $\mu$ L, the green color of samples is oversaturated, indicating the SYBR Green I is excessive. Therefore, 4 ng/ $\mu$ L SYBR Green I is used in the following visual RT-MIPLAMP assay.

### 3. The sensitivity of RT-MIPLAMP for assaying ORF1ab gene

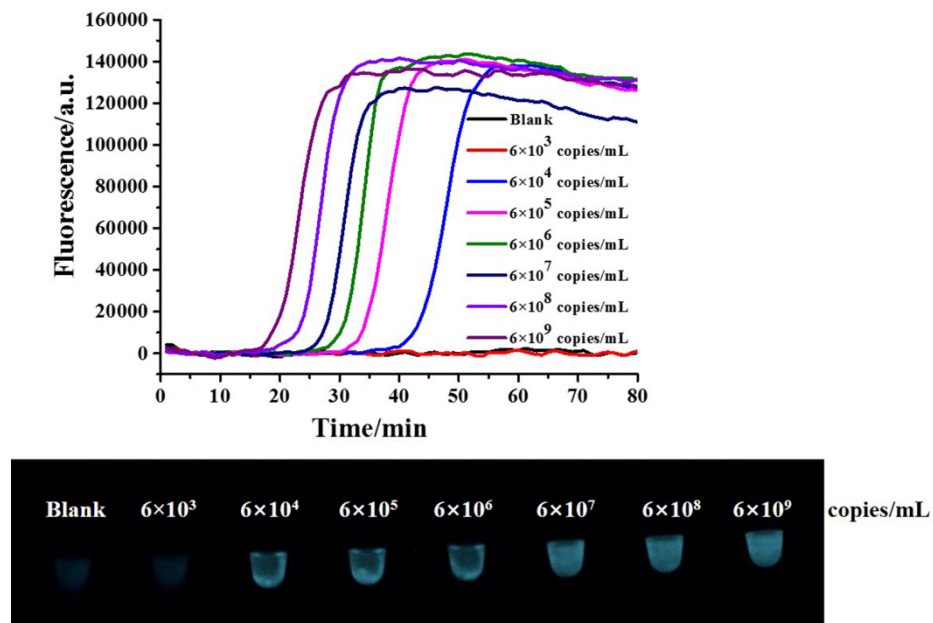

Fig. S2 Sensitivity determination of the RT-MIPLAMP assay on ORF1ab gene. ORF1ab gene in different concentrations are respectively detected with (a) real-time fluorescence monitoring and (b) visual method. The concentrations of the ORF1ab gene are 0,  $6 \times 10^3$ ,  $6 \times 10^4$ ,  $6 \times 10^5$ ,  $6 \times 10^6$ ,  $6 \times 10^7$ ,  $6 \times 10^8$  and  $6 \times 10^9$  copies/mL, respectively.

#### 4. The effect of loop primers on RT-MIPLAMP for assaying N gene

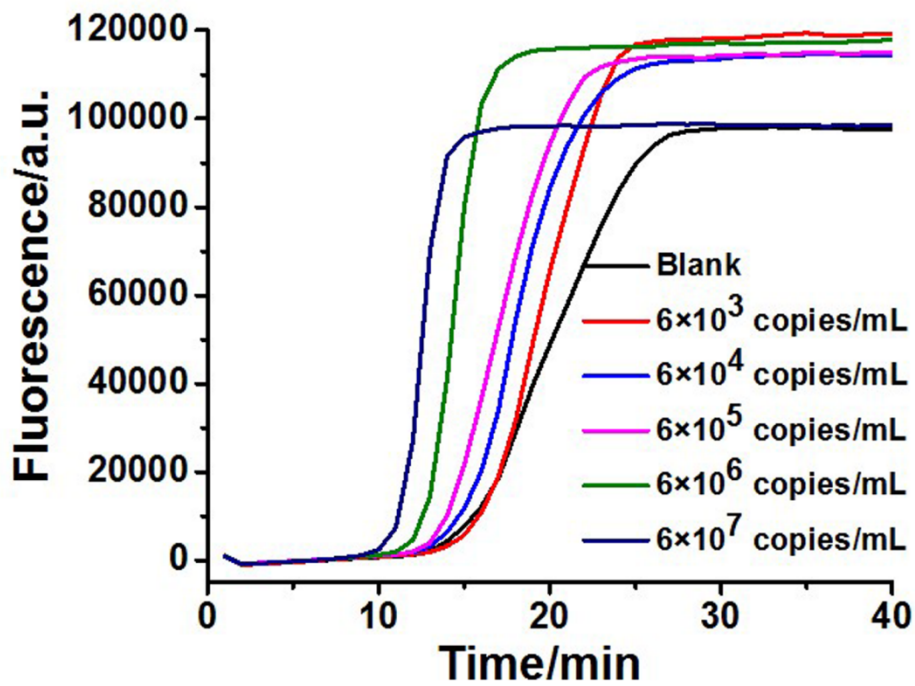

Fig. S3 The fluorescent curves are produced from 0,  $6 \times 10^3$ ,  $6 \times 10^4$ ,  $6 \times 10^5$ ,  $6 \times 10^6$  and  $6 \times 10^7$  copies/mL N gene by using RT-MIPLAMP primers and loop primers for the FIP-1 and BIP-1.
